# Supplementary material for: A critical period for antidepressant-induced acceleration of neuronal maturation in adult dentate gyrus
Source: PubMed Central journal article supplement — Transl Psychiatry. 2017 Sep 19;7(9):e1235–. doi: 10.1038/tp.2017.208 (PMC5639251; doi:10.1038/tp.2017.208), 2017-09-19
Supplement: tp2017208x2.pdf [file tp2017208x2.pdf]

|          | Treatment | Gender          | Sample number (cells) |            | Dendritic length ( $\mu\text{m}$ ) |                  |                                                                                    | No. of Branch points |                 |                                                                                    |
|----------|-----------|-----------------|-----------------------|------------|------------------------------------|------------------|------------------------------------------------------------------------------------|----------------------|-----------------|------------------------------------------------------------------------------------|
|          |           |                 | Vehicle               | Fluoxetine | Vehicle                            | Fluoxetine       | Statistics                                                                         | Vehicle              | Fluoxetine      | Statistics                                                                         |
| Fig. 1/5 | 2 weeks   | Female (Fig. 1) | 78                    | 77         | 75.2 $\pm$ 9.2                     | 138.8 $\pm$ 15.6 | Group: p < 0.001<br>Gender: p < 0.001<br>Group x Gender: p > 0.05<br>Two-way ANOVA | 1.08 $\pm$ 0.18      | 2.14 $\pm$ 0.27 | Group: p < 0.001<br>Gender: p < 0.005<br>Group x Gender: p > 0.05<br>Two-way ANOVA |
|          |           | Male (Fig. 5)   | 150                   | 299        | 109.7 $\pm$ 7.1                    | 198.3 $\pm$ 10.5 |                                                                                    | 1.80 $\pm$ 0.14      | 2.80 $\pm$ 0.15 |                                                                                    |
|          | 3 weeks   | Female (Fig. 1) | 31                    | -          | 151.4 $\pm$ 33.2                   | -                | -                                                                                  | 1.71 $\pm$ 0.34      | -               | -                                                                                  |
|          |           | Male (Fig. 1)   | 74                    | 149        | 248.6 $\pm$ 25.7                   | 254.6 $\pm$ 22.9 | p > 0.05<br>Two-tailed t-test                                                      | 2.62 $\pm$ 0.28      | 2.37 $\pm$ 0.21 | p > 0.05<br>Two-tailed t-test                                                      |
|          | 4 weeks   | Female (Fig. 1) | 59                    | 41         | 257.8 $\pm$ 30.9                   | 238.7 $\pm$ 33.3 | Group: p > 0.05<br>Gender: p < 0.005<br>Group x Gender: p > 0.05<br>Two-way ANOVA  | 2.53 $\pm$ 0.33      | 2.61 $\pm$ 0.42 | Group: p > 0.05<br>Gender: p < 0.05<br>Group x Gender: p > 0.05<br>Two-way ANOVA   |
|          |           | Male (Fig. 1)   | 19                    | 24         | 397.6 $\pm$ 63.1                   | 356.8 $\pm$ 58.5 |                                                                                    | 4.05 $\pm$ 0.62      | 3.33 $\pm$ 0.52 |                                                                                    |
| Fig. 2   |           | Female          | 45                    | 45         | 84.7 $\pm$ 10.0                    | 189.5 $\pm$ 25.1 | Group: p < 0.001<br>Gender: p > 0.05<br>Group x Gender: p > 0.05<br>Two-way ANOVA  | 1.27 $\pm$ 0.20      | 2.78 $\pm$ 0.35 | Group: p < 0.001<br>Gender: p > 0.05<br>Group x Gender: p > 0.05<br>Two-way ANOVA  |
|          |           | Male            | 60                    | 44         | 102.9 $\pm$ 10.2                   | 203.9 $\pm$ 25.2 |                                                                                    | 1.90 $\pm$ 0.23      | 3.00 $\pm$ 0.36 |                                                                                    |
| Fig. 4   | Day 0-7   | Female          | -                     | -          | -                                  | -                | -                                                                                  | -                    | -               | -                                                                                  |
|          |           | Male            | 90                    | 90         | 79.1 $\pm$ 9.6                     | 70.6 $\pm$ 8.0   | p > 0.05<br>Two-tailed t-test                                                      | 1.34 $\pm$ 0.20      | 1.23 $\pm$ 0.19 | p > 0.05<br>Two-tailed t-test                                                      |
|          | Day 7-14  | Female          | 302                   | 223        | 79.8 $\pm$ 5.8                     | 122.6 $\pm$ 8.1  | Group: p < 0.001<br>Gender: p > 0.05<br>Group x Gender: p > 0.05<br>Two-way ANOVA  | 1.46 $\pm$ 0.12      | 2.45 $\pm$ 0.18 | Group: p < 0.005<br>Gender: p > 0.05<br>Group x Gender: p < 0.05<br>Two-way ANOVA  |
|          |           | Male            | 63                    | 261        | 87.7 $\pm$ 10.3                    | 107.3 $\pm$ 6.5  |                                                                                    | 1.86 $\pm$ 0.26      | 2.06 $\pm$ 0.14 |                                                                                    |
